# Supplementary material for: Dental Students’ Didactic and Psychomotor Skills Performance in Dental Anatomy and Preclinical Operative Dentistry Courses in a Saudi Governmental School
Source: Hindawi journal article supplement (doi:10.1155/2021/7713058), 2021-12-02
Supplement: f1 [file 7713058.f1.zip]

# Dental Anatomy and Occlusion Course

## Rubric

Practical Evaluation Form / Maxillary Central Incisor Wax Carving  
(2<sup>nd</sup> Year, 2020-21)

Student's Name:-----

Comp No:-----

| Student's Self evaluation |                                                            |          |          |               |                                                                                      |  |  |  |
|---------------------------|------------------------------------------------------------|----------|----------|---------------|--------------------------------------------------------------------------------------|--|--|--|
|                           | Criteria                                                   | Poor / 0 | Good / 1 | Excellent / 2 |                                                                                      |  |  |  |
| Labial Aspect             | 1. Accurate measurements                                   |          |          |               |  |  |  |  |
|                           | 2. Crown shape (Trapezoidal)                               |          |          |               |                                                                                      |  |  |  |
|                           | 3. Position of contact areas                               |          |          |               |                                                                                      |  |  |  |
|                           | 4. Sharpe mesio-incisal angle, rounded disto-incisal angle |          |          |               |                                                                                      |  |  |  |
| Lingual Aspect            | 1. Lingual convergence                                     |          |          |               |                                                                                      |  |  |  |
|                           | 2. Clear marginal ridges and incisal ridges                |          |          |               |                                                                                      |  |  |  |
|                           | 3. Wide & Shallow fossa                                    |          |          |               |                                                                                      |  |  |  |
|                           | 4. Rounded cingulum                                        |          |          |               |                                                                                      |  |  |  |
| Proximal Aspect           | 1. Crown shape ( Triangular)                               |          |          |               |                                                                                      |  |  |  |
|                           | 2. Labial and lingual outlines                             |          |          |               |                                                                                      |  |  |  |
|                           | 3. Height of contour in cervical third                     |          |          |               |                                                                                      |  |  |  |
|                           | 4. Curvature of cervical line                              |          |          |               |                                                                                      |  |  |  |
| Incisal Aspect            | Outline features                                           |          |          |               |                                                                                      |  |  |  |
| Root features             | Overall conical shape with rounded apex                    |          |          |               |                                                                                      |  |  |  |
| Waxing skills             | Wax finishing and polishing                                |          |          |               |                                                                                      |  |  |  |
| Out of 30/ -----          |                                                            |          |          |               |                                                                                      |  |  |  |

**Maxillary Central Incisor Wax carving**  
**Scoring Rubric**  
 2<sup>nd</sup> year / 2017-18

| Contents           | Poor / 0                       | Good / 1                                     | Excellent / 2                         |
|--------------------|--------------------------------|----------------------------------------------|---------------------------------------|
| 1. Labial Aspect   | Severe deviation from criteria | Most crown and root outlines are represented | All outlines are represented properly |
| 2. Lingual aspect  | Severe deviation from criteria | Most crown and root outlines are represented | All outlines are properly represented |
| 3. Proximal aspect | Severe deviation from criteria | Most crown and root outlines are represented | All outlines are properly represented |
| 4. Incisal aspect  | Severe deviation from criteria | Most outlines are represented                | All outlines are properly represented |
| 5. Root Features   | Severe deviation from criteria | Most outlines are represented                | All outlines are properly represented |
| E. Waxing skills   | No Polishing                   | Moderate polished                            | Highly polished                       |
