# Supplementary material for: Dental Students’ Didactic and Psychomotor Skills Performance in Dental Anatomy and Preclinical Operative Dentistry Courses in a Saudi Governmental School
Source: Hindawi journal article supplement (doi:10.1155/2021/7713058), 2021-12-02
Supplement: f1 [file 7713058.f1.zip]

1. Amalgam, Resin Composite and Temporary Restorations Rubric

| Parameter             | Description                       | Grade                            |                                                  |                                            | Total |      |
|-----------------------|-----------------------------------|----------------------------------|--------------------------------------------------|--------------------------------------------|-------|------|
|                       |                                   | 2                                | 1                                                | 0                                          |       |      |
| Margins               | Sealing and Integrity             | All margins sealed with no ditch | -                                                | Submargins all around the restoration      | 10%   | 20%  |
|                       | Overhang                          | No                               | -                                                | Yes                                        | 10%   |      |
| Contour and contact   | Proximal                          | Properly contoured               | Partially contoured                              | Flat                                       | 10%   | 30%  |
|                       | Occlusal                          | Properly contoured               | Partially contoured                              | Flat                                       | 10%   |      |
|                       | Contact*                          | Tight                            | Light                                            | Open                                       | 10%   |      |
| Anatomy               | Cusps                             | All built                        | Some built                                       | Flat cusps                                 | 10%   | 20%  |
|                       | Pits and fissures                 | - Created<br>- Original depth    | - Partially created<br>- Shallow (under carving) | - Flat<br>- Deepened (over carving)        | 10%   |      |
| Surface texture       | Finishing (Smooth and no flashes) | All smooth                       | Partially smooth                                 | Rough                                      | 10%   | 20%  |
|                       | Polishing**                       | Lustrous                         | Partially lustrous                               | Matt                                       | 10%   |      |
| Checking of Occlusion | Relation to the Opposing          | Proper occlusion                 | -                                                | Premature contact (presence of high spots) | 10%   | 10%  |
| Total                 |                                   |                                  |                                                  |                                            |       | 100% |

\*Contact is examined by dental floss.

\*\*For Resin Composite restorations.

Critical mistakes:

1. Improper condensation for amalgam.
2. Improper packing of resin composite.

**Preclinical Operative  
& Esthetic Dentistry Course**

**PRECLINICAL  
ASSESSMENT BOOKLET  
2019-2020**

**Restoration Assessment Form**

Tooth No.: Molar (    )

Class: II

Type of restoration: ☐ Composite

☐ Amalgam

|                                            |                                 |                                |                                                                                                                                                                                   |
|--------------------------------------------|---------------------------------|--------------------------------|-----------------------------------------------------------------------------------------------------------------------------------------------------------------------------------|
| <b>Ethical conduct and professionalism</b> | <input type="checkbox"/><br>Yes | <input type="checkbox"/><br>No | Student shows respect towards staff, and colleagues. Student follows faculty directives, student wears appropriate professional attire, presents only his/her work (no cheating). |
| <b>Communication skills</b>                | <input type="checkbox"/><br>Yes | <input type="checkbox"/><br>No | Student communicates efficiently with instructors using clear words and logical sequence.                                                                                         |
| <b>Cubic/tray organization</b>             | <input type="checkbox"/><br>Yes | <input type="checkbox"/><br>No | Student organizes the instruments in the proper sequence in his/her tray. Surfaces are clean and properly wrapped. No visible littering.                                          |

*0 none of criteria fulfilled, 1 min one criteria fulfilled, 2 some of criteria fulfilled, 3 all criteria fulfilled*

| Steps and procedures   | Weight %  | Student self-evaluation |   |   | Instructor evaluation |   |   | Feedback |    |    |
|------------------------|-----------|-------------------------|---|---|-----------------------|---|---|----------|----|----|
|                        |           | 0                       | 1 | 2 | 0                     | 1 | 2 |          |    |    |
| <b>Margins</b>         | <b>20</b> |                         |   |   |                       |   |   | S/       | O/ |    |
| <b>Contour/Contact</b> | <b>30</b> |                         |   |   |                       |   |   | P/       | O/ | C/ |
| <b>Anatomy</b>         | <b>20</b> |                         |   |   |                       |   |   | C/       | P/ |    |
| <b>Surface texture</b> | <b>20</b> |                         |   |   |                       |   |   | F/       | P/ |    |
| <b>Occlusion</b>       | <b>10</b> |                         |   |   |                       |   |   | O/       |    |    |

|             |                                    |              |
|-------------|------------------------------------|--------------|
| <b>Date</b> | <b>Faculty Stamp and Signature</b> | <b>Score</b> |
|             |                                    | /10          |

☐ Level C - Basic Ability

☐ Level B - Competent Ability

☐ Level A - Proficient Ability
