# Supplementary material for: Dental Students’ Didactic and Psychomotor Skills Performance in Dental Anatomy and Preclinical Operative Dentistry Courses in a Saudi Governmental School
Source: Hindawi journal article supplement (doi:10.1155/2021/7713058), 2021-12-02
Supplement: f1 [file 7713058.f1.zip]

## 1. Cavity Preparation for Resin Composite Rubric

| Stage                   | Principle                  | Grade                                                                             |                                                                                 |                                                                            | Total |      |
|-------------------------|----------------------------|-----------------------------------------------------------------------------------|---------------------------------------------------------------------------------|----------------------------------------------------------------------------|-------|------|
|                         |                            | 2                                                                                 | 1                                                                               | 0                                                                          |       |      |
| Outline Form            | Width                      | <b>Minimal</b><br>Buccolingual width = 1/4 the inter cuspal distance              | <b>Slightly wide</b><br>Buccolingual width >1/4 < 1/2 the inter cuspal distance | <b>Wide</b><br>Buccolingual width > 2/3 the inter cuspal distance          | 10%   | 30%  |
|                         | Extension                  | <b>Proper</b><br>Primary pits and fissure are included                            | <b>Under-extended</b><br>Does not include all the primary pits and fissure      | <b>Over-extended</b><br>Extends to the cusps and marginal ridge            | 10%   |      |
|                         | Depth                      | <b>Proper and even</b><br>> 1 mm < 3 mm                                           | <b>Uneven</b><br>Cavity depth uneven                                            | <b>Shallow/Deep</b><br>< 1 mm OR > 3 mm                                    | 10%   |      |
| Primary Resistance form | Pulpal and gingival floor  | <b>Uniform</b><br>Horizontal, flat AND uniform                                    | <b>Half is uniform</b><br>Half is horizontal, flat and/or slanted               | <b>Not uniform</b><br>Not flat AND not uniform                             | 10%   | 30%  |
|                         | Wall direction             | <b>Converged</b><br>Buccal and lingual walls converge                             | <b>Half converged</b><br>Half of the buccal or lingual walls converged          | <b>Diverged</b><br>Buccal and lingual walls diverged                       | 10%   |      |
|                         | Line angles                | <b>Slightly rounded</b>                                                           | <b>Half is rounded</b>                                                          | <b>Sharp</b>                                                               | 10%   |      |
| Primary Retention form  | Primary retentive features | - Efficient undercut AND<br>- Efficient bonding technique                         | - Inefficient undercut OR<br>- Inefficient bonding technique                    | - Inefficient undercut AND<br>- Inefficient bonding technique              | 10%   | 20%  |
|                         | Each part is retentive     | <b>All retentive</b>                                                              | <b>Partially retentive</b>                                                      | <b>Not retentive</b>                                                       | 10%   |      |
| Finishing of walls      | Cavo-surface margin        | - 90 degrees for CI I and II OR<br>- Proper bevel when indicated in CI III, IV, V | - Some are 90 degrees AND/OR<br>- Narrow or ununiform bevel when indicated      | - All are not 90 degrees AND<br>- Inappropriate or NO bevel when indicated | 10%   | 20%  |
|                         | Walls                      | <b>Smooth</b>                                                                     | <b>Half are smooth</b>                                                          | <b>Rough</b>                                                               | 10%   |      |
| Total                   |                            |                                                                                   |                                                                                 |                                                                            |       | 100% |

### Critical mistakes:

- Improper cavity depth:
  - Less than 1 mm (repeated more than twice).
  - More than 3 mm pulpally or axially.
- Any damage to the adjacent tooth/teeth.

**Preclinical Operative  
& Esthetic Dentistry Course**

**PRECLINICAL  
ASSESSMENT BOOKLET  
2019-2020**

**Cavity Preparation Assessment Form**

Tooth No.: Molar (    )

Class: II

Type of restoration: ☒ Composite    ☐ Amalgam

|                                            |                                 |                                |                                                                                                                                                                                   |
|--------------------------------------------|---------------------------------|--------------------------------|-----------------------------------------------------------------------------------------------------------------------------------------------------------------------------------|
| <b>Ethical conduct and professionalism</b> | <input type="checkbox"/><br>Yes | <input type="checkbox"/><br>No | Student shows respect towards staff, and colleagues. Student follows faculty directives, student wears appropriate professional attire, presents only his/her work (no cheating). |
| <b>Communication skills</b>                | <input type="checkbox"/><br>Yes | <input type="checkbox"/><br>No | Student communicates efficiently with instructors using clear words and logical sequence.                                                                                         |
| <b>Cubic/tray organization</b>             | <input type="checkbox"/><br>Yes | <input type="checkbox"/><br>No | Student organizes the instruments in the proper sequence in his/her tray. Surfaces are clean and properly wrapped. No visible littering.                                          |

*0 none of criteria fulfilled, 1 min one criteria fulfilled, 2 some of criteria fulfilled, 3 all criteria fulfilled*

| Steps and procedures | Weight % | Student self-evaluation |   |   | Instructor evaluation |   |   | Feedback |    |    |
|----------------------|----------|-------------------------|---|---|-----------------------|---|---|----------|----|----|
|                      |          | 0                       | 1 | 2 | 0                     | 1 | 2 |          |    |    |
| Outline Form         | 30       |                         |   |   |                       |   |   | W/       | E/ | D/ |
| Resistance Form      | 30       |                         |   |   |                       |   |   | F/       | W/ | A/ |
| Retention Form       | 20       |                         |   |   |                       |   |   | R/       | E/ |    |
| Finishing of walls   | 20       |                         |   |   |                       |   |   | C/       | W/ |    |

| Date | Faculty Stamp and Signature | Score |
|------|-----------------------------|-------|
|      |                             | /10   |

- ☐ Level C - Basic Ability
- ☐ Level B - Competent Ability
- ☐ Level A - Proficient Ability
