# Supplementary material for: Dental Students' Didactic and Psychomotor Skills Performance in Dental Anatomy and Preclinical Operative Dentistry Courses in a Saudi Governmental School
Source: Int J Dent. 2021 Dec 2;2021:7713058. doi: 10.1155/2021/7713058 (PMC8660179; doi:10.1155/2021/7713058)
Supplement: Supplementary Materials — Appendix A: an example of the practical evaluation form of a maxillary central incisor wax carving and scoring rubric in the dental anatomy and occlusion course. Appendix B: cavity preparation for resin composite rubric and practical assessment form of class II cavity preparation in the preclinical operative and esthetic dentistry course. Appendix C: restoration rubric and practical assessment form of class II resin composite restoration in the preclinical operative and esthetic dentistry course. [file 7713058.f1.zip]

Archive with 3 entries (3 files):
- Appendix 1 (1).pdf
- Appendix 2 (1).pdf
- Appendix 3 (1).pdf
